# Supplementary material for: Transcriptional and genomic parallels between the monoxenous parasite Herpetomonas muscarum and Leishmania
Source: PubMed Central journal article supplement (PMC6872171; doi:10.1371/journal.pgen.1008452), 2019-11-11

A

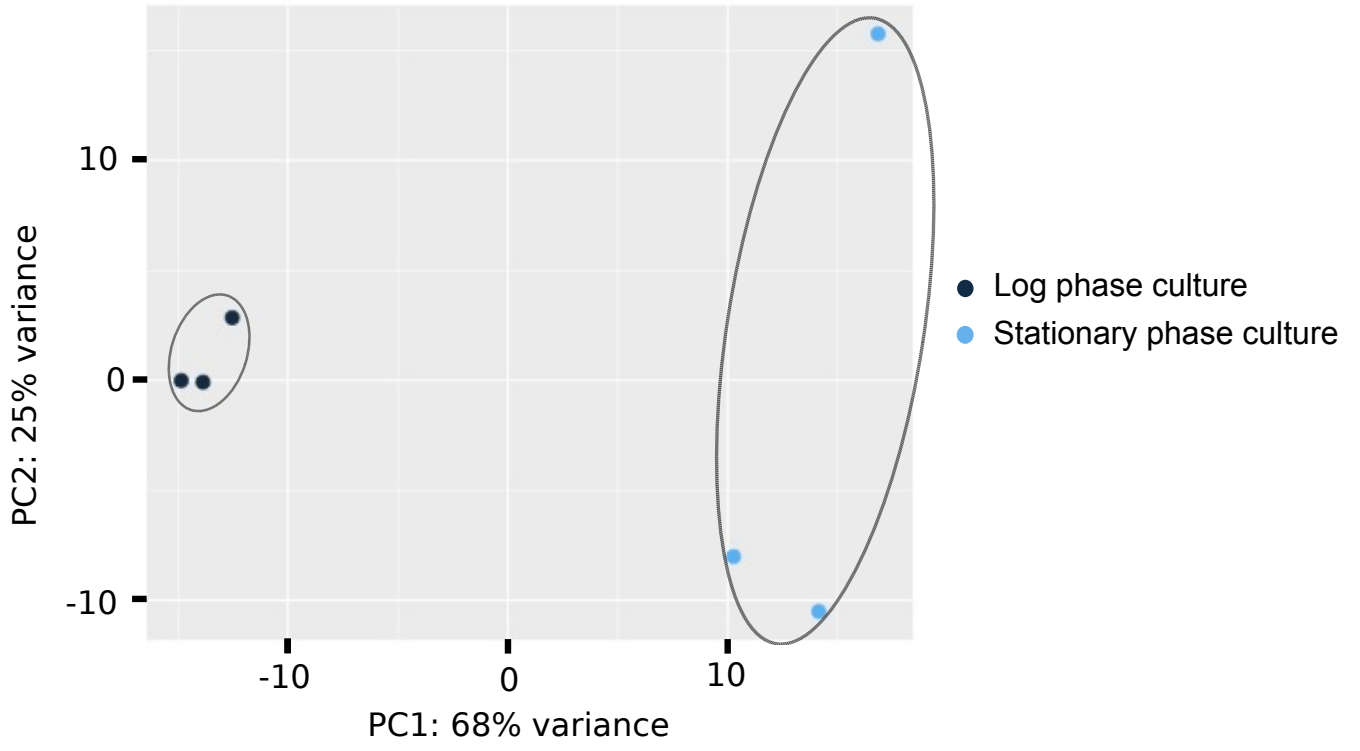

Supplement: pgen.1008452.s002.pdf [file pgen.1008452.s002.pdf]
