# Supplementary material for: Transcriptional and genomic parallels between the monoxenous parasite Herpetomonas muscarum and Leishmania
Source: PLoS Genet. 2019 Nov 11;15(11):e1008452. doi: 10.1371/journal.pgen.1008452 (PMC6872171; doi:10.1371/journal.pgen.1008452)
Supplement: S6 Table — (XLSX) [file pgen.1008452.s008.xlsx]

## Sheet: Table S6- RNAi
T. brucei gene ID	Gene Name	H. muscarum gene ID
Tb927.10.10850	TbAGO1	HMUS01000200.1
Tb927.8.2370	TbDCL1	HMUS00115700.1
Tb927.3.1230	TbDCL2	HMUS00436800.1.1
Tb927.10.8880	TbRIF4	HMUS01081900.1
Tb927.10.10730	TbRIF5	HMUS01117000.1
